# Supplementary material for: Association Between Frailty and Blood Pressure Variability: A Systematic Review and Meta-analysis
Source: Research Square preprint supplement (doi:10.21203/rs.3.rs-7668298/v1), 2025-10-17
Supplement: Supplementary file 1 [file 6a64d327530381e92ea60dc3.docx]

**Supplementary Table S2.** Quality assessment for the studies included using the JBI tool for cross-sectional studies.

| **Study** | **Were the criteria for inclusion in the sample clearly defined?** | **Were the study subjects and the setting described in detail?** | **Was the exposure measured in a valid and reliable way?** | **Were objective, standard criteria used for measurement of the condition?** | **Were confounding factors identified?** | **Were strategies to deal with confounding factors stated?** | **Were the outcomes measured in a valid and reliable way?** | **Was appropriate statistical analysis used?** | **Overall appraisal** |
| --- | --- | --- | --- | --- | --- | --- | --- | --- | --- |
| **Zhu 2020** | Yes | Yes | Yes | Yes | Yes | Yes | Yes | Yes | 8/8 |
| **Wu 2017** | Yes | Yes | Yes | Yes | Unclear | No | Yes | Unclear | 5/8 |
| **Gijón-Conde 2017** | Yes | Yes | Yes | Yes | Yes | Yes | Yes | Yes | 8/8 |
| **Zanotto 2024** | Yes | Yes | Yes | Yes | Unclear | Unclear | Yes | Yes | 6/8 |
| **Gu 2023** | Yes | Yes | Yes | Yes | Yes | Unclear | Yes | Yes | 7/8 |
| **Choi 2022** | Yes | Yes | Yes | Yes | Yes | Yes | Yes | Yes | 8/8 |
| **Bastos-Barbosa 2012** | Yes | Yes | Yes | Yes | Unclear | Unclear | Yes | Yes | 6/8 |
| **Blauth 2021** | Yes | Yes | Yes | Yes | Yes | Yes | Yes | Yes | 8/8 |
| **Woo 2018** | Yes | Yes | Yes | Yes | Yes | Yes | Yes | Yes | 8/8 |
