# Supplementary material for: Association Between Frailty and Blood Pressure Variability: A Systematic Review and Meta-analysis
Source: Research Square preprint supplement (doi:10.21203/rs.3.rs-7668298/v1), 2025-10-17
Supplement: Supplementary file 2 [file 73798fc885ec70b8a4866cbf.docx]

**Supplementary Table S1**. Search strategy and keywords for systematic database search

| **Total Records: n= 6787** |
| --- |
| - After Delete of Duplicate Records (Covidence and manual identification): **n=3222** (n=3478 duplicates identified by Covidence, n=87 duplicates identified manually) |
| **PubMed (n=1206)** |
| **3** ("blood pressure variability"[Title/Abstract] OR "blood pressure variation"[Title/Abstract] OR "diurnal blood pressure variation"[Title/Abstract] OR "nocturnal blood pressure"[Title/Abstract] OR "non-dipping pattern"[Title/Abstract] OR "morning blood pressure"[Title/Abstract] OR "evening blood pressure"[Title/Abstract] OR "24-hour blood pressure"[Title/Abstract] OR "ambulatory blood pressure monitoring"[Title/Abstract] OR "BP variability"[Title/Abstract] OR "systolic blood pressure variability"[Title/Abstract] OR "diastolic blood pressure variability"[Title/Abstract]) AND ("frailty"[Title/Abstract] OR "frail elderly"[Title/Abstract] OR "frailty index"[Title/Abstract] OR "clinical frailty scale"[Title/Abstract] OR "frailty phenotype"[Title/Abstract] OR "physical frailty"[Title/Abstract] OR "sarcopenia"[Title/Abstract] OR "grip strength"[Title/Abstract] OR "walking speed"[Title/Abstract] OR "gait speed"[Title/Abstract] OR "hand strength"[Title/Abstract] OR "SPPB"[Title/Abstract] OR "activities of daily living"[Title/Abstract] OR "functional decline"[Title/Abstract] OR "aged"[Title/Abstract] OR "older adults"[Title/Abstract] OR "geriatrics"[Title/Abstract]) Publication Date ("blood pressure variability"[Title/Abstract] OR "blood pressure variation"[Title/Abstract] OR "diurnal blood pressure variation"[Title/Abstract] OR "nocturnal blood pressure"[Title/Abstract] OR "non-dipping pattern"[Title/Abstract] OR "morning blood pressure"[Title/Abstract] OR "evening blood pressure"[Title/Abstract] OR "24-hour blood pressure"[Title/Abstract] OR "ambulatory blood pressure monitoring"[Title/Abstract] OR "BP variability"[Title/Abstract] OR "systolic blood pressure variability"[Title/Abstract] OR "diastolic blood pressure variability"[Title/Abstract]) AND ("frailty"[Title/Abstract] OR "frail elderly"[Title/Abstract] OR "frailty index"[Title/Abstract] OR "clinical frailty scale"[Title/Abstract] OR "frailty phenotype"[Title/Abstract] OR "physical frailty"[Title/Abstract] OR "sarcopenia"[Title/Abstract] OR "grip strength"[Title/Abstract] OR "walking speed"[Title/Abstract] OR "gait speed"[Title/Abstract] OR "hand strength"[Title/Abstract] OR "SPPB"[Title/Abstract] OR "activities of daily living"[Title/Abstract] OR "functional decline"[Title/Abstract] OR "aged"[Title/Abstract] OR "older adults"[Title/Abstract] OR "geriatrics"[Title/Abstract])  **n= 1206**  **2** ("frailty"[Title/Abstract] OR "frail elderly"[Title/Abstract] OR "frailty index"[Title/Abstract] OR "clinical frailty scale"[Title/Abstract] OR "frailty phenotype"[Title/Abstract] OR "physical frailty"[Title/Abstract] OR "sarcopenia"[Title/Abstract] OR "grip strength"[Title/Abstract] OR "walking speed"[Title/Abstract] OR "gait speed"[Title/Abstract] OR "hand strength"[Title/Abstract] OR "SPPB"[Title/Abstract] OR "activities of daily living"[Title/Abstract] OR "functional decline"[Title/Abstract] OR "aged"[Title/Abstract] OR "older adults"[Title/Abstract] OR "geriatrics"[Title/Abstract] Publication Date "frailty"[Title/Abstract] OR "frail elderly"[Title/Abstract] OR "frailty index"[Title/Abstract] OR "clinical frailty scale"[Title/Abstract] OR "frailty phenotype"[Title/Abstract] OR "physical frailty"[Title/Abstract] OR "sarcopenia"[Title/Abstract] OR "grip strength"[Title/Abstract] OR "walking speed"[Title/Abstract] OR "gait speed"[Title/Abstract] OR "hand strength"[Title/Abstract] OR "SPPB"[Title/Abstract] OR "activities of daily living"[Title/Abstract] OR "functional decline"[Title/Abstract] OR "aged"[Title/Abstract] OR "older adults"[Title/Abstract] OR "geriatrics"[Title/Abstract])  **n= 1,075,991**  **1** ("blood pressure variability"[Title/Abstract] OR "blood pressure variation"[Title/Abstract] OR "diurnal blood pressure variation"[Title/Abstract] OR "nocturnal blood pressure"[Title/Abstract] OR "non-dipping pattern"[Title/Abstract] OR "morning blood pressure"[Title/Abstract] OR "evening blood pressure"[Title/Abstract] OR "24-hour blood pressure"[Title/Abstract] OR "ambulatory blood pressure monitoring"[Title/Abstract] OR "BP variability"[Title/Abstract] OR "systolic blood pressure variability"[Title/Abstract] OR "diastolic blood pressure variability"[Title/Abstract] Publication Date "blood pressure variability"[Title/Abstract] OR "blood pressure variation"[Title/Abstract] OR "diurnal blood pressure variation"[Title/Abstract] OR "nocturnal blood pressure"[Title/Abstract] OR "non-dipping pattern"[Title/Abstract] OR "morning blood pressure"[Title/Abstract] OR "evening blood pressure"[Title/Abstract] OR "24-hour blood pressure"[Title/Abstract] OR "ambulatory blood pressure monitoring"[Title/Abstract] OR "BP variability"[Title/Abstract] OR "systolic blood pressure variability"[Title/Abstract] OR "diastolic blood pressure variability"[Title/Abstract])  **n= 12,082** |
| **Scopus (n=1370)** |
| TITLE-ABS ( "blood pressure variability" OR "blood pressure variation" OR "diurnal blood pressure variation" OR "nocturnal blood pressure" OR "non-dipping pattern" OR "morning blood pressure" OR "evening blood pressure" OR "24-hour blood pressure" OR "ambulatory blood pressure monitoring" OR "BP variability" OR "systolic blood pressure variability" OR "diastolic blood pressure variability" ) AND TITLE-ABS ( "frailty" OR "frail elderly" OR "frailty index" OR "clinical frailty scale" OR "frailty phenotype" OR "physical frailty" OR "sarcopenia" OR "grip strength" OR "walking speed" OR "gait speed" OR "hand strength" OR "SPPB" OR "activities of daily living" OR "functional decline" OR "aged" OR "older adults" OR "geriatrics" )  **n=1370** |
| **Web of Science (n=1455)** |
| 1: TS=("blood pressure variability" OR "blood pressure variation" OR "diurnal blood pressure variation" OR "nocturnal blood pressure" OR "non-dipping pattern" OR "morning blood pressure" OR "evening blood pressure" OR "24-hour blood pressure" OR "ambulatory blood pressure monitoring" OR "BP variability" OR "systolic blood pressure variability" OR "diastolic blood pressure variability")  Date Run: Mon Jul 28 2025 15:23:53 GMT+0300 (GMT+03:00)  Results: 17042  2:  Date Run: TS=("frailty" OR "frail elderly" OR "frailty index" OR "clinical frailty scale" OR "frailty phenotype" OR "physical frailty" OR "sarcopenia" OR "grip strength" OR "walking speed" OR "gait speed" OR "hand strength" OR "SPPB" OR "activities of daily living" OR "functional decline" OR "aged" OR "older adults" OR "geriatrics")  Date Run: Mon Jul 28 2025 15:24:10 GMT+0300 (GMT+03:00)  Results: 1245394 |
| **Cochrane Library (n=1610)** |
| #1 "blood pressure variability" OR "blood pressure variation" OR "diurnal blood pressure variation" OR "nocturnal blood pressure" OR "non-dipping pattern" OR "morning blood pressure" OR "evening blood pressure" OR "24-hour blood pressure" OR "ambulatory blood pressure monitoring" OR "BP variability" OR "systolic blood pressure variability" OR "diastolic blood pressure variability" 3175  #2 "frailty" OR "frail elderly" OR "frailty index" OR "clinical frailty scale" OR "frailty phenotype" OR "physical frailty" OR "sarcopenia" OR "grip strength" OR "walking speed" OR "gait speed" OR "hand strength" OR "SPPB" OR "activities of daily living" OR "functional decline" OR "aged" OR "older adults" OR "geriatrics" 715829  #3 #1 AND #2 1610  **n = 1610** |
| **Ovid MEDLINE(R) and Epub Ahead of Print, In-Process, In-Data-Review & Other Non-Indexed Citations, Daily and Versions <1946 to July 25, 2025> (n= 1146)** |
| 1 ("blood pressure variability" or "blood pressure variation" or "diurnal blood pressure variation" or "nocturnal blood pressure" or "non-dipping pattern" or "morning blood pressure" or "evening blood pressure" or "24-hour blood pressure" or "ambulatory blood pressure monitoring" or "BP variability" or "systolic blood pressure variability" or "diastolic blood pressure variability").ti. or ("blood pressure variability" or "blood pressure variation" or "diurnal blood pressure variation" or "nocturnal blood pressure" or "non-dipping pattern" or "morning blood pressure" or "evening blood pressure" or "24-hour blood pressure" or "ambulatory blood pressure monitoring" or "BP variability" or "systolic blood pressure variability" or "diastolic blood pressure variability").ab. 11504  2 ("frailty" or "frail elderly" or "frailty index" or "clinical frailty scale" or "frailty phenotype" or "physical frailty" or "sarcopenia" or "grip strength" or "walking speed" or "gait speed" or "hand strength" or "SPPB" or "activities of daily living" or "functional decline" or "aged" or "older adults" or "geriatrics").ti. or ("frailty" or "frail elderly" or "frailty index" or "clinical frailty scale" or "frailty phenotype" or "physical frailty" or "sarcopenia" or "grip strength" or "walking speed" or "gait speed" or "hand strength" or "SPPB" or "activities of daily living" or "functional decline" or "aged" or "older adults" or "geriatrics").ab. 1047426  **3 1 and 2** 1146  **n= 1146** |
