# Supplementary material for: Association Between Frailty and Blood Pressure Variability: A Systematic Review and Meta-analysis
Source: Research Square preprint supplement (doi:10.21203/rs.3.rs-7668298/v1), 2025-10-17
Supplement: Supplementary file 3 [file 9a29e1a8774c0d223b00a616.docx]

**Supplementary Table S3.** Further details on the included papers**.**

| **Article** | **Detailed Findings** | **Main Limitations** | **Adjustment for Confounders & Variables** | **Differences in baseline characteristics between frail vs control** |
| --- | --- | --- | --- | --- |
| **Bastos-Barbosa 2012** | -Office BP and HBPM did not differ between frail, prefrail, and nonfrail groups.  - ABPM revealed that frail individuals had higher 24-hour systolic and diastolic BP, particularly during sleep, compared with nonfrail participants.  **-** No significant differences between groups across sitting, supine, or standing positions. Orthostatic hypotension was seen in 6.5% and was not specifically linked to frailty.  - No significant differences in morning (T1), evening (T2), or combined measurements between frail, prefrail, and nonfrail groups.  - Differences were especially evident during sleep, with frail participants showing higher nocturnal SBP and DBP. Longitudinal ABPM plots (Figure 1) showed greater fluctuations over time in the frail group, especially at night. | Limited sample size (only 77 participants) and single-center study, which limits statistical power and generalizability. | The analysis was adjusted for age and gender in the statistical model. Other possible confounders were described but not comprehensively adjusted for. | -No significant differences between frail, prefrail, and nonfrail groups with respect to age, sex distribution, sociodemographic characteristics, number of comorbidities, disease distribution, number of medications, use of antihypertensive agents, statins, ACE inhibitors/ARBs, calcium channel blockers, beta-blockers, diuretics, body weight, BMI, fasting glucose, total cholesterol, LDL cholesterol, and triglycerides.  - The only significant differences were observed in abdominal circumference, which was lower in nonfrail compared with frail participants, and HDL cholesterol, which was higher in the nonfrail group. |
| **Blauth 2021** | -Very elderly (>80 y) outpatients  -24-hour SBP and DBP, MAP, pulse pressure, and heart rate were similar between the two groups. Awake SBP and DBP were similar for both (frail and nonfrail) groups.  -Frailty was associated with high nocturnal SBP, greater prevalence of non-dipping, and reduced SBP fall.  -Presence of frailty was independently associated with a 6.1% reduction in BP fall, an increase in SBP nondipping and a lower SBP nocturnal decrease. | Sample size was limited (n = 74). | Frailty assessment (via the Fried model) was adjusted for sex, height, and body mass index. Multivariate analysis was adjusted for age, presence of hypertension, number of antihypertensives taken, 24-hour SBP, and presence of orthostatic hypotension. | Frailty was associated with an increased number of comorbidities, increased incidence of hypertension and diabetes, increased SBP nondipping, and a lower SBP nocturnal decrease. |
| **Choi 2022** | -Frail residents had lower mean BP and higher day-to-day BPV.  - Increased BPV was maintained irrespective of treatment with antihypertensive medication.  -No significant difference in CV of SBP and DBP among frail and pre-frail individuals. | Observational; clinical setting measurements without a strict protocol. | Statistical analysis was adjusted for sex, systolic and diastolic blood pressure, activities of daily living (ADL), physical frailty, and cognitive function when identifying independent factors associated with blood pressure variability. | Groups comparable in many baselines (hypertension and diabetes incidence, BMI, SBP, DBP, treatment with antihypertensive medication). Pre-frail individuals had a higher proportion of males (32.2%) compared to frail (16.4%) individuals. |
| **Gijón-Conde 2017** | -Higher frailty levels were linked to lower daytime systolic blood pressure (SBP), higher nighttime SBP, reduced nocturnal SBP dipping, and a higher night/day ratio.  -Disabled participants showed similar patterns, with significantly lower daytime SBP and higher nighttime SBP compared to those without disability.  -Overall, there was a consistent trend across frailty categories and disability status, indicating that both conditions are associated with unfavorable blood pressure patterns. Frail patients had a 3.5 mm Hg lower daytime SBP and 3.6 mm Hg higher nighttime SBP, while disabled patients had a 2.5 mm Hg lower daytime SBP. | Cross-sectional; selection bias possible. | Statistical analyses were adjusted for sociodemographic variables, BMI, lifestyles, treatment plans, comorbidities, 24-hour heart rate, and conventional or ambulatory SBP. | Compared with nonfrail individuals, frail patients were older, composed of more females, had higher rates of unmarriage, consumed more alcohol, were less adherent to the Mediterranean diet, were more physically inactive, had worse sleep quality, and had higher BMI, and more comorbidities. |
| **Wu 2017** | -Morning SBP was significantly different among the groups, but DBP and other SBP/DBP measures over 24 hours, daytime, and nighttime showed no significant differences.  -BPV analysis revealed significant differences in 24-hour SBPV and daytime SBPV, while other BPV measures did not differ.  -Ordinal regression indicated that frailty was negatively influenced by morning SBP, though 24-hour and daytime SBPV were not significantly associated. | Single center; modest sample; limited regression. | The statistical analysis adjusted for gender, age, smoking history, hypertension duration, antihypertensive drug use, blood lipids, fasting glucose, and uric acid. | The study found no significant differences in demographic or clinical characteristics, including gender, age, smoking, lipid levels, fasting glucose, or antihypertensive drug use, across control, prefrail, and frail groups. |
| **Zhu 2020** | -Frail and pre-frail participants exhibited higher SBP and pulse pressure, but lower DBP, across 24-hour, daytime, and nighttime periods compared to non-frail individuals.  -BPV measures, including ARV, CV, SD, and weighted SD, were significantly greater in frail patients.  -Regression analysis revealed that ARV and CV of SBP over 24 hours, both during daytime and nighttime, were independently associated with frailty, even after adjusting for covariates. I  -Only 24-hour systolic SD remained significantly associated with frailty after adjustment, while weighted SD showed no independent association. | Single-center inpatient; cross-sectional. | In adjusted models, statistical analysis was adjusted for factors such as age, gender, BMI, treatment plan, and the mean value of 24-hour ABPM. | The groups were similar in terms of gender, BMI, smoking status, and diabetes prevalence, though stroke was more common in frail and pre-frail patients. While conventional sitting blood pressure did not differ among groups, frail individuals were prescribed more antihypertensive agents overall, particularly diuretics, though use of ACEI, ARB, β-blockers, and CCBs showed no significant differences. |
| **Gu 2023** | -The analysis showed that frail and pre-frail groups had significantly lower serum albumin (ALB) and HDL-C levels compared with the non-frail group, while TC, TG, LDL-C, and CR levels showed no significant differences.  -Blood pressure analysis revealed that 24-hour and daytime systolic blood pressure were significantly lower in frail and pre-frail individuals, while other systolic and diastolic measures were similar across groups.  -Multivariate logistic regression identified age as a risk factor for frailty, whereas higher serum ALB and HDL-C levels acted as protective factors in older adults. | Hospitalized sample (bias possible); cross-sectional. | Multivariate analysis was adjusted for age, serum albumin, and HDL-C. | The study compared baseline characteristics among pre-frail, frail, and non-frail groups, each with a balanced distribution of males and females. The groups were similar in mean age (around 69.8 years) and body mass index (about 27.3 kg/m²). Educational levels varied across groups, but no statistically significant differences were observed in any baseline data. Overall, the three groups were comparable in demographic and clinical characteristics. |
| **Zanotto 2024** | -Frail patients showed significantly higher systolic BP variability across very-low-frequency, low-frequency, high-frequency, and total power spectral density bands, as well as higher diastolic HF-BPV compared with non-frail participants.  -Mean systolic and diastolic BP values did not differ between the groups, suggesting variability rather than absolute pressure distinguished frailty status. Logistic regression adjusted for age and sex identified systolic VLF-BPV, HF-BPV, and PSD-BPV as predictors of frailty, while further adjustment for diabetes confirmed independent associations for VLF-BPV and PSD-BPV.  -Systolic BP variability, rather than diastolic changes, is more strongly linked to frailty in patients receiving hemodialysis. | The small sample size (n=69) may have limited statistical power, particularly for detecting associations with diastolic BP variability. Absence of an age- and sex-matched non-ESKD control group and reference BPV values makes clinical interpretation more difficult. | Logistic regression models were adjusted for age and sex, with a sensitivity analysis further adjusting for diabetes. | Compared with the non-frail group, frail participants were significantly older, took more prescribed medications, and had lower albumin and creatinine levels. Frail individuals also had a proportion of females |
| **Woo 2018** | -Multivariate analysis showed that high BPV was significantly associated with frailty overall (OR 1.57; 95% CI 1.05–2.37), but subgroup analysis revealed this association was significant only in women.  -Over a 12-month follow-up, similar patterns were observed, with high BPV linked to transition to a more frail state.  -Path analysis also suggested a connection between high BPV and hospitalization, indicating both direct and indirect effects. | This study had a low proportion of men (~25%) and a relatively low overall frailty prevalence (20%), which may explain why the association between BPV and frailty was observed only in women. A brief frailty screening tool was used, which may have limited sensitivity, suggesting that more detailed assessments could reveal stronger correlations with BPV. | Model 1: no adjustment; Model 2: adjusted for age and sex; Model 3: added marital status and education; Model 4: self-reported comorbidities. | Participants with high blood pressure variability (BPV) were older, had lower education, more chronic diseases (including hypertension, diabetes, heart disease, and stroke), sarcopenia, and frailty, and had greater hospital service use in the past year. |

*****All studies were cross-sectional in design; therefore, no follow-up is present, which stands as a common limitation
